# Supplementary material
Source: PubMed Central journal article supplement (PMC6597379)
Supplement: JB.00761-18-s0001.pdf [file JB.00761-18-s0001.pdf]

**Table S1. Strains and Plasmids**

| <b>Genotype/Features</b>                                                | <b>Reference or Source</b> |
|-------------------------------------------------------------------------|----------------------------|
| <u>Strains</u>                                                          |                            |
| O395                                                                    | Laboratory strain          |
| O395- <i>pspA</i> -His <sub>6</sub>                                     | This study                 |
| O395 $\Delta$ <i>lacZ</i>                                               | Laboratory strain          |
| O395 $\Delta$ <i>pspFABC</i>                                            | This study                 |
| O395 $\Delta$ <i>pspA</i>                                               | This study                 |
| O395 $\Delta$ <i>pspB</i>                                               | This study                 |
| O395 $\Delta$ <i>pspBC</i>                                              | This study                 |
| O395 $\Delta$ <i>pspF</i>                                               | This study                 |
| O395 <i>lacZ</i> $\Omega$ P <i>pspA</i>                                 | This study                 |
| O395 <i>lacZ</i> $\Omega$ P <i>pspA</i> , <i>pspA</i> -His <sub>6</sub> | This study                 |
| DH5 $\alpha$                                                            | Laboratory strain          |
| JM101                                                                   | Laboratory strain          |
| DH5 $\alpha$ $\lambda$ pir                                              | Laboratory strain          |
| SM10 $\lambda$ pir                                                      | Laboratory strain          |
| <u>Plasmids</u>                                                         |                            |
| pTTQ18                                                                  | (1)                        |
| pKAS32                                                                  | (2)                        |
| pBAD18-kan                                                              | (3)                        |
| pBAD33                                                                  | (3)                        |
| pBAD30                                                                  | (3)                        |
| pKAS32- $\Delta$ <i>pspA</i>                                            | This study                 |
| pKAS32- $\Delta$ <i>pspB</i>                                            | This study                 |
| pKAS32- $\Delta$ <i>pspC</i>                                            | This study                 |
| pKAS32- $\Delta$ <i>pspBC</i>                                           | This study                 |
| pKAS32- $\Delta$ <i>pspF</i>                                            | This study                 |

|                                 |            |
|---------------------------------|------------|
| pKAS32- $\Delta$ <i>pspFABC</i> | This study |
| pKAS32- <i>PpspA::lacZ</i>      | This study |
| pKAS32- <i>pspA-6xHis</i>       | This study |
| pTTQ18- <i>gspD-6xHis</i>       | This study |
| pTTQ18- <i>tcpC-6xHis</i>       | This study |
| pTTQ18- <i>pilQ-6xHis</i>       | This study |
| pTTQ18- <i>mshL-6xHis</i>       | This study |
| pBAD18-kan- <i>gspD-6xHis</i>   | This study |
| pBAD18-kan- <i>tcpC-6xHis</i>   | This study |
| pBAD18-kan- <i>pilQ-6xHis</i>   | This study |
| pBAD18-kan- <i>mshL-6xHis</i>   | This study |
| pBAD33- <i>pspA-6xHis</i>       | This study |
| pBAD33- <i>ompT-FLAG</i>        | This study |
| pBAD30- <i>pspA-6xHis</i>       | This study |
| pBAD30- <i>pspBC-6xHis</i>      | This study |
| pBAD30-6xHis- <i>pspF</i>       | This study |
| pBAD30- <i>crp-FLAG</i>         | This study |

1. Stark MJR. 1987. Multicopy expression vectors carrying the lac repressor gene for regulated high-level expression of genes in Escherichia coli. *Gene* 51:255-267.
2. Skorupski K, Taylor RK. 1996. Positive selection vectors for allelic exchange. *Gene* 169:47-52.
3. Guzman LM, Belin D, Carson MJ, Beckwith J. 1995. Tight regulation, modulation, and high-level expression by vectors containing the arabinose PBAD promoter. *J Bacteriol* 177:4121-30.

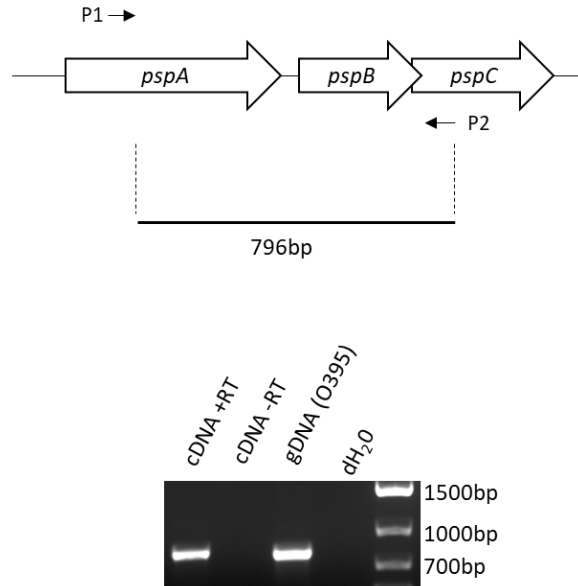

**Figure S1. *pspABC* are cotranscribed.** Cultures were grown to mid-log phase when GspD expression was induced for one hour. RNA was harvested for RT-PCR analysis. Primers spanning from *pspA* (P1) to *pspC* (P2) were used for amplification from cDNA made by reverse transcription (+RT), reverse transcription negative (-RT) samples, or from genomic DNA (gDNA).

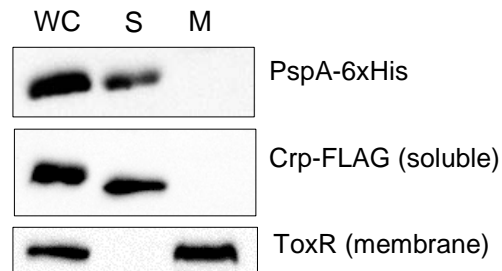

**Figure S2. PspA is primarily localized in the soluble fraction under non-inducing conditions.** Cultures were grown to mid-log phase before fractionation into soluble (S) and membrane (M) fractions. Crp-FLAG and ToxR were used as cytoplasmic and membrane controls, respectively. WC = whole cell lysate, S = soluble, M = membrane fractions.

**A**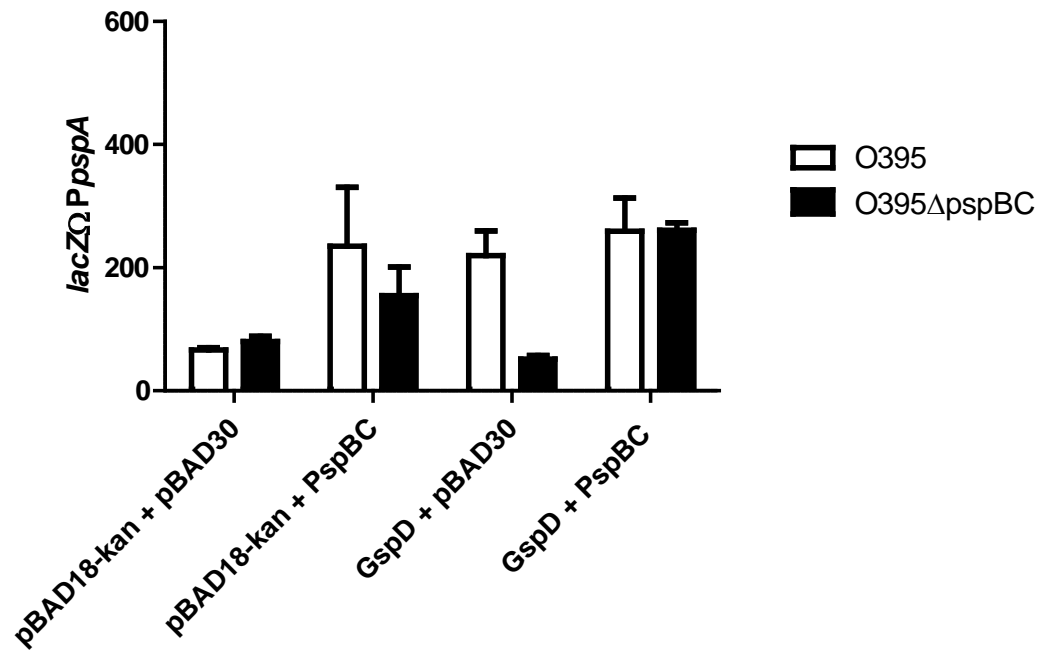**B**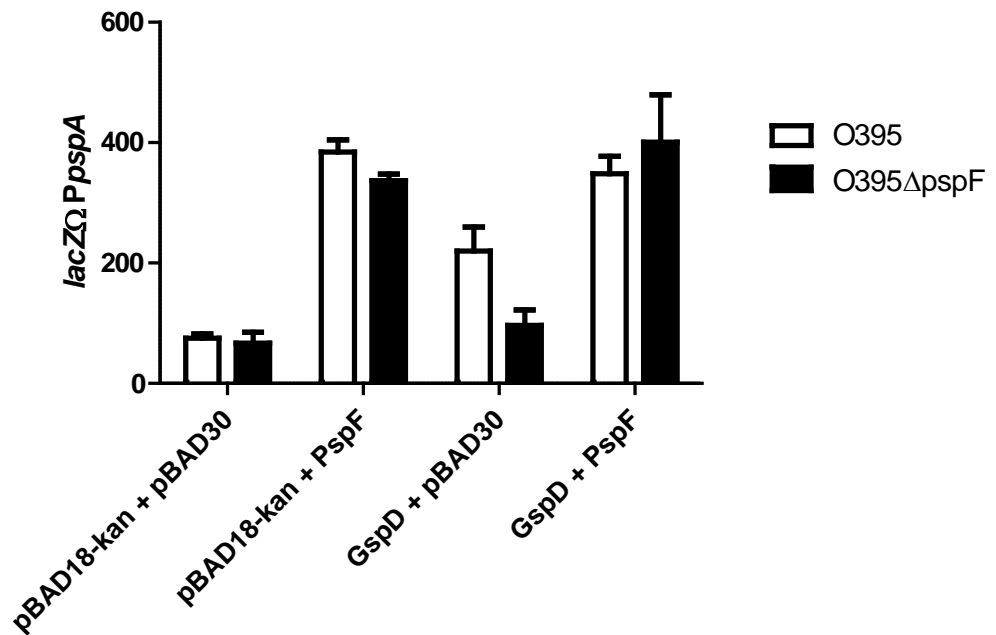

**Figure S3. Complementation with *pspBC* and *pspF* restore *psp* activity to their respective deletion strains.** Cultures were grown to mid-log phase when GspD and *psp* expression were induced for one hour.  $\beta$ -galactosidase activity was detected from the chromosomal reporter *lacZ $\Omega$ PpspA*.
